# Supplementary material
Source: PubMed Central journal article supplement (PMC9981220)
Supplement: crc-21-0047-s01.pdf [file crc-21-0047-s01.pdf]

# Supplemental Table S1

| Cancer Type                      | Location       | Effect   | Sequence Change | Amino Acid Change |
|----------------------------------|----------------|----------|-----------------|-------------------|
| <b>LEUKEMIA/LYMPHOMA</b>         |                |          |                 |                   |
| B-cell Lymphoma                  | chr2:215593522 | Missense | c.2212A>G       | p.I738V           |
| Acute Lymphoblastic Leukemia     | chr2:215595164 | Missense | c.1972C>T       | p.R658C           |
| Acute Lymphoblastic Leukemia     | chr2:215593522 | Missense | c.2212A>G       | p.I738V           |
| Acute Lymphoblastic Leukemia     | chr2:215595164 | Missense | c.1972C>T       | p.R658C           |
| Acute Myeloid Leukemia           | chr2:215595164 | Missense | c.1972C>T       | p.R658C           |
| Acute Myeloid Leukemia           | chr2:215595164 | Missense | c.1972C>T       | p.R658C           |
| Leukemia                         | chr2:215593522 | Missense | c.2212A>G       | p.I738V           |
| Burkitt lymphoma                 | chr2:215610518 | Missense | c.1738G>A       | p.E580K           |
| <b>BRAIN TUMORS</b>              |                |          |                 |                   |
| Astrocytoma                      | chr2:215674261 | Missense | c.33G>T         | p.Q11H            |
| Atypical Teratoid/Rhabdoid Tumor | chr2:215595164 | Missense | c.1972C>T       | p.R658C           |
| Glioma, Brain Stem               | chr2:215610518 | Missense | c.1738G>A       | p.E580K           |
| Glioblastoma                     | chr2:215593522 | Missense | c.2212A>G       | p.I738V           |
| Glioma, Brain Stem               | chr2:215595164 | Missense | c.1972C>T       | p.R658C           |
| DIPG                             | chr2:215595164 | Missense | c.1972C>T       | p.R658C           |
| Choroid Plexus Carcinoma         | chr2:215593522 | Missense | c.2212A>G       | p.I738V           |
| <b>NEUROBLASTOMA</b>             |                |          |                 |                   |
| Neuroblastoma                    | chr2:215674261 | Missense | c.33G>T         | p.Q11H            |
| Neuroblastoma                    | chr2:215674261 | Missense | c.33G>T         | p.Q11H            |
| <b>BONE SARCOMA</b>              |                |          |                 |                   |
| Rhabdomyosarcoma                 | chr2:215595164 | Missense | c.1972C>T       | p.R658C           |
| Osteosarcoma                     | chr2:215593522 | Missense | c.2212A>G       | p.I738V           |
| Osteosarcoma                     | chr2:215595164 | Missense | c.1972C>T       | p.R658C           |
| <b>OTHER</b>                     |                |          |                 |                   |
| Angiosarcoma                     | chr2:215593522 | Missense | c.2212A>G       | p.I738V           |
| Wilms tumor                      | chr2:215595164 | Missense | c.1972C>T       | p.R658C           |
| Wilms tumor                      | chr2:215593543 | Missense | c.2191C>G       | p.R731G           |
| Squamous Cell carcinoma          | chr2:215593522 | Missense | c.2212A>G       | p.I738V           |

**benign/likely benign**

## Supplemental Table S1.

**Benign germline *BARD1* variants.** Benign or likely benign germline *BARD1* variants identified in the PEDS MiONCOseq and St. Jude PeCan datasets. This serves as an extension of the data presented in **Table 1**.
