# Supplementary material
Source: PubMed Central journal article supplement (PMC9981220)
Supplement: crc-21-0047-s03.pdf [file crc-21-0047-s03.pdf]

## Supplemental Table S2

| cell line | variant      | predicted impact     | sensitivity (rank) |             |           |
|-----------|--------------|----------------------|--------------------|-------------|-----------|
|           |              |                      | olaparib           | talazoparib | niraparib |
| A673      | <b>TP53</b>  | pathogenic           | 34                 | 31          | 32        |
|           | <b>ERCC2</b> | benign/likely benign |                    |             |           |
| CADOES1   | <b>SLX4</b>  | pathogenic           | 42                 | 13          |           |
|           | <b>APC</b>   | likely benign        |                    |             |           |
| SKPNDW    | <b>FANCM</b> | pathogenic           |                    |             | 48        |
|           | <b>TP53</b>  | likely pathogenic    |                    |             |           |
| RDES      | <b>TP53</b>  | pathogenic           |                    |             |           |
| MHES1     | <b>TP53</b>  | likely pathogenic    | 41                 |             | 22        |
| ES1       | <b>TP53</b>  | pathogenic           | 23                 | 23          |           |
| ES3       | <b>TP53</b>  | likely pathogenic    |                    |             |           |
| ES5       | <b>PTCH2</b> | likely benign        |                    |             |           |
|           | <b>TP53</b>  | pathogenic           |                    |             |           |
| ES6       | <b>TP53</b>  | likely pathogenic    |                    |             |           |
| ES7       | <b>POLE</b>  | likely benign        | 21                 | 18          | 6         |
|           | <b>FKBP3</b> | VUS                  |                    |             |           |
|           | <b>FANCM</b> | pathogenic           |                    |             |           |
|           | <b>ERCC4</b> | benign/likely benign |                    |             |           |
|           | <b>TP53</b>  | likely pathogenic    |                    |             |           |
| ES8       | <b>TP53</b>  | pathogenic           | 10                 | 5           | 8         |
| EW16      | <b>TP53</b>  | likely pathogenic    |                    |             |           |
| EW22      | <b>TP53</b>  | pathogenic           | 14                 | 8           | 10        |
| EW24      | <b>APC</b>   | benign               |                    |             |           |
|           | <b>TP53</b>  | likely pathogenic    |                    |             |           |

**benign/likely benign**  
**variant of unknown significance**  
**pathogenic/likely pathogenic**

### Supplemental Table S2.

**Prevalence of somatic DNA damage repair gene variants in Ewing cell lines included in original studies of PARP inhibition.** Cancer cell line encyclopedia (CCLE) data was queried for somatic mutations in DNA damage repair gene mutations in the 14 Ewing sarcoma cell lines listed. The predicted/known impacts of the somatic mutations and sensitivity rank (sensitivity to a compound as compared to all other cells lines in the CCLE) to the PARP inhibitors olaparib, talazoparib and niraparib are also noted.
