# Supplementary material
Source: PubMed Central journal article supplement (PMC9981220)
Supplement: crc-21-0047-s04.pdf [file crc-21-0047-s04.pdf]

# Supplemental Figure S2

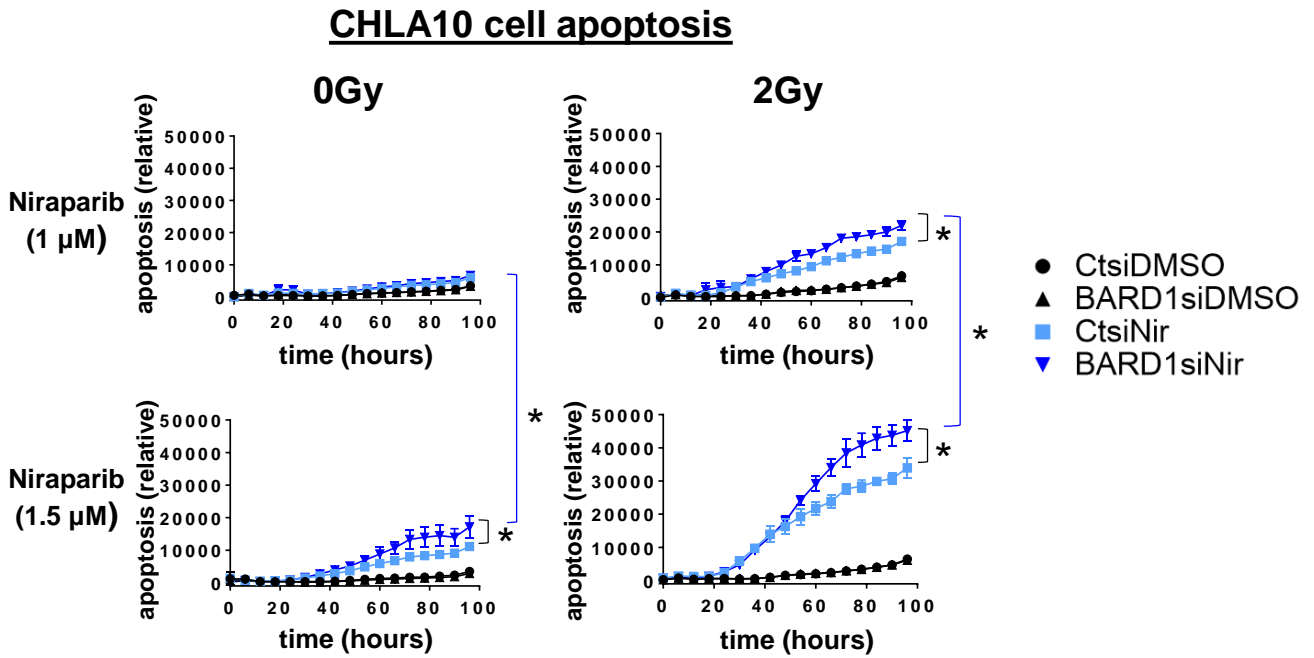

## Supplemental Figure S2.

**BARD1 loss enhances Ewing sarcoma cell apoptosis in response to niraparib plus radiation in CHLA10 Ewing sarcoma cells.** CHLA10 cells were treated with control (Ctsi) or BARD1 (BARD1si) siRNA, Nir (at doses indicated) versus DMSO control, and either 0 or 2 Gy radiation and monitored via IncuCyte apoptosis assay (Caspase 3/7 activity). For these experiments, cells were seeded in the presence of Nir and radiation was performed at 12-15 hours. Relative apoptosis (caspase 3/7 activity) is calculated as green fluorescence in  $\mu\text{M}^2$  divided by percent confluence. Experiments were completed minimally in biological triplicate. These data correspond with Figure 3 in the main text. \* denotes p-value  $<0.01$  as determined by ANOVA analysis with Tukey's multiple comparisons test. Black brackets indicate comparison between CtsiNir and BARDsiNir at the same Nira dose. Blue brackets indicate comparison between BARDsiNir samples at 1 versus 1.5  $\mu\text{M}$  doses of Niraparib. Error bars denote S.D.
