# Supplementary material
Source: PubMed Central journal article supplement (PMC9981220)
Supplement: crc-21-0047-s06.pdf [file crc-21-0047-s06.pdf]

## Supplemental Figure S4

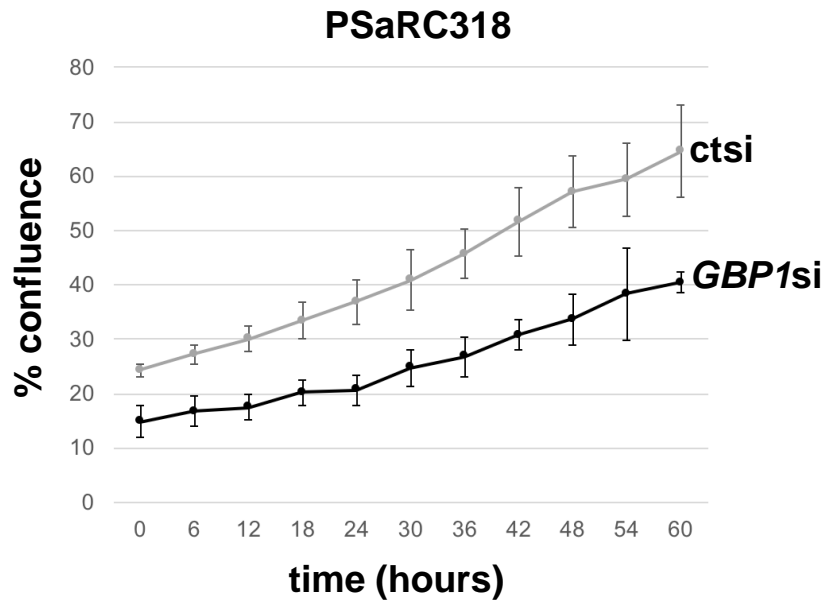

### Supplemental Figure S4.

**PSaRC318 cell confluency data.** PSaRC318 cells were treated with control (ct) or *GPB1* siRNA and then subjected to IncuCyte live cell monitoring over time (data corresponding to Figure 5). Baseline differences in non-normalized cell confluency between *ctsi* and *GBP1si*-treated PSaRC318 cells is plotted over time. Experiments completed minimally in biological triplicate. Error bars denote S.D.
