# Supplementary material
Source: PubMed Central journal article supplement (PMC9981220)
Supplement: crc-21-0047-s07.pdf [file crc-21-0047-s07.pdf]

## Supplemental Figure S5

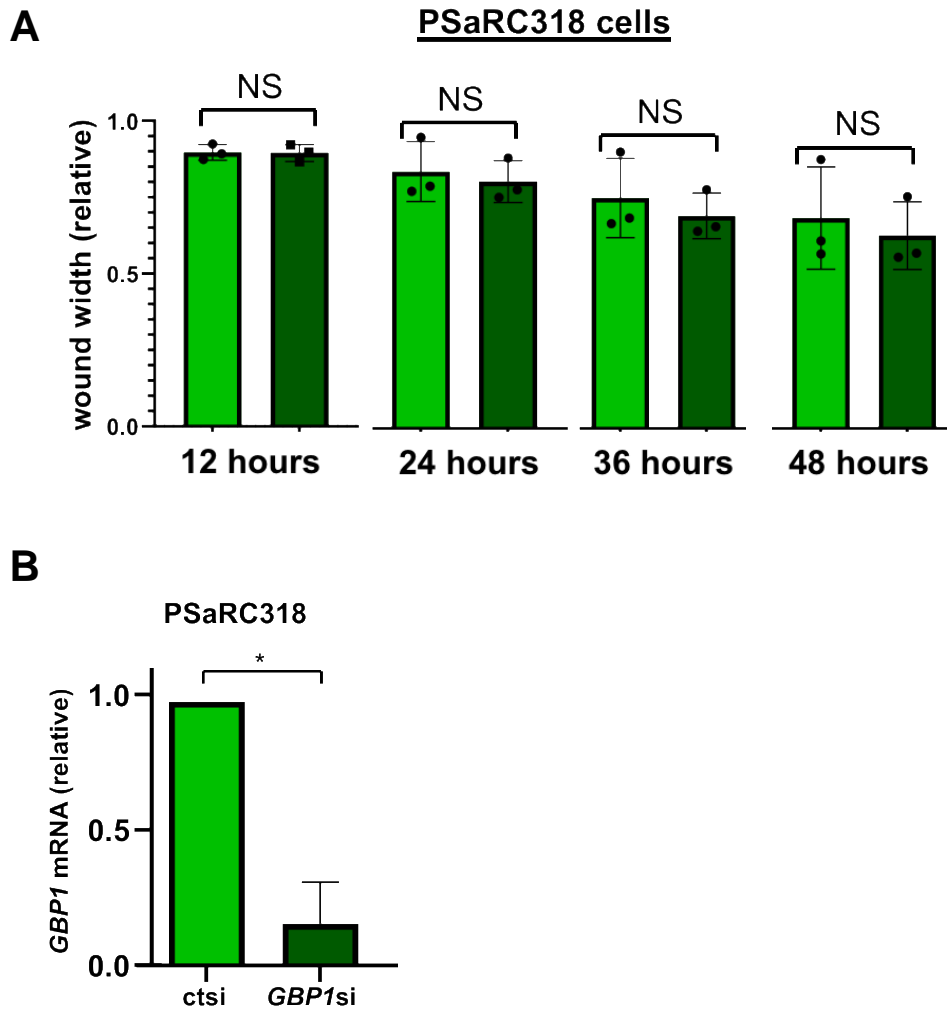

### Supplemental Figure S5. Loss of GBP1 expression does not impact PSaRC318 cell migration.

**A**, PSaRC318 Ewing sarcoma cells were transfected with control (ct, light green) or *GBP1* (dark green) siRNA for 48 hours and then seeded into wells of a 96-well plate in technical triplicate and allowed to form a confluent monolayer overnight. A linear scratch was made with the Incucyte 96-well WoundMaker Tool and live-cell monitoring of wound width was performed over time. This graph displays the wound width as a percentage of the initial wound width (width at time=0 hours). **B**, qRT-PCR showing *GBP1* mRNA expression in PSaRC318 cells treated with ctsi or *GBP1* siRNA. Experiments were completed in biological triplicate. NS= not significant, denoting a p-value >0.05. \* denotes a p-value <0.05. Error bars denote S.D.
